# Supplementary material for: Increasing frequencies of site-specific mutagenesis and gene targeting in Arabidopsis by manipulating DNA repair pathways
Source: HighWire-hosted journal article supplement (doi:10.1101/gr.145557.112), 2013-01-02
Supplement: SuppLegends.docx [file SuppLegends.docx]

**SUPPLEMENTARY FIGURES**

**Fig. S1.** Biological reagents used in this study. (A) The ADH1-ZFN and its target site. (B) Detection of ADH1-ZFN monomers in *ADH1-ZFN-4* transgenic plants by immunoblot analysis. FLAG-tagged ADH1-ZFN right monomers were detected by anti-FLAG antibody, as pointed out by an arrow. Non-specific cross-reacting bands in both samples are indicated by an asterisk. (C) Precise location of the transgene in *ADH1-ZFN-4* line as mapped by TAIL-PCR. (D) A T-DNA insertional allele of *smc6* (named *smc6b-3*) appears to be null for RNA expression. For RT-PCR, a pair of primers that anneal on both sides of the T-DNA insertion site were used to detect *SMC6B* mRNA. Amplification of *Actin2* mRNA was used as a control. (E) Chromosomal locations of DNA repair genes, *ADH1* and the *ADH1-ZFN* transgene in this study. (F) A scheme showing how Arabidopsis double mutants were generated by crossing and further screening.

**Fig. S2.** Enhanced mutagenesis mediated by the TT4-ZFN and MPK8-ZFN in the *smc6b* background. (A) The TT4-ZFN and its target site. The ZFN binding sequences are bold and underlined. The NspI restriction site is marked in red. (B) One-week old seedlings of *TT4-ZFN* T1 transgenics in Col and *smc6b* background grown on 20 µM Estradiol MS medium were pooled for DNA extraction, followed by PCR and digestion with NspI. Signal intensity of the uncut band, as measured by densitometry, was divided by the total signal from uncut and cut bands. Four biological replicates of each transgenic type were analyzed for NHEJ frequencies. (C) The MPK8-ZFN and its target site. The ZFN binding sequences are bold and underlined. The MslI restriction site is marked in red. (D) The experiment was performed as described in panel B, except that both the *MPK8-ZFN* transgene and MslI restriction enzyme were used.

**Fig. S3.** Gene targeting donor sequence. The sequence of the donor plasmid is shown. Sequences marked in yellow represent both left and right homology arms. The sequence marked in green represents the novel sequence to be inserted in the *ADH1* locus by HR.

**Fig S4.** MH-based deletions predominate in *ku70* and *lig4* in samples treated with both donor and estradiol. (A) Distribution of deletions by length. The error bars indicate standard errors. Statistically significant differences between the genotypes are indicated by asterisks (P <0.05, t-test). (B) Distribution of deletions using no or 1~6 bp of putative MH. The error bars indicate standard errors. (C) Profile of 2 to 150 bp deletions. MH sequences contributing to large deletion peaks are indicated. (D) Distribution of deletions that use different 6 bp of MH around the ZFN cleavage site. The distances of the left MH sequence and the right MH sequence to the DSB are indicated in the parentheses and separated by a slash. Protoplasts derived from Col, *ku70*, *lig4* and *smc6b* plants carrying the same *ADH1-ZFN* -4 transgene were treated with estradiol, and three independent biological replicates were subjected to 454 sequencing and analysis. The results from three replicates are summed for analysis in panel D.

**Fig. S5.** NHEJ insertion profiles by length. (A) Distribution of NHEJ insertions by length in estradiol-treated samples. (B) Distribution of NHEJ insertions by length in donor and estradiol-treated samples. The error bars indicate standard errors. Statistically significant differences between the mutants and Col are indicated by asterisks (P <0.05, t-test).
